# Supplementary material
Source: MDPI journal article supplement (https://www.mdpi.com/2071-1050/14/4/2255)
Supplement: s1 [file s1]

# Seasonal abundance and distribution patterns of microplastics in the Lis River, Portugal

Bárbara Sá <sup>1</sup>, Joana Pais <sup>1,\*</sup>, Joana Antunes <sup>1</sup>, João Pequeno <sup>1</sup>, Ana Pires <sup>1,2</sup> and Paula Sobral <sup>1</sup>

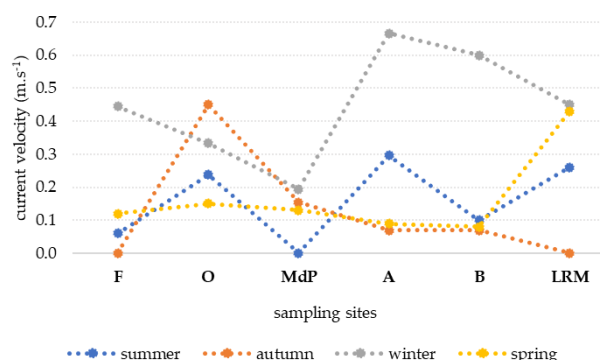

**Figure S1.** Current velocity measured in situ (m.s<sup>-1</sup>) during the year along Lis River.

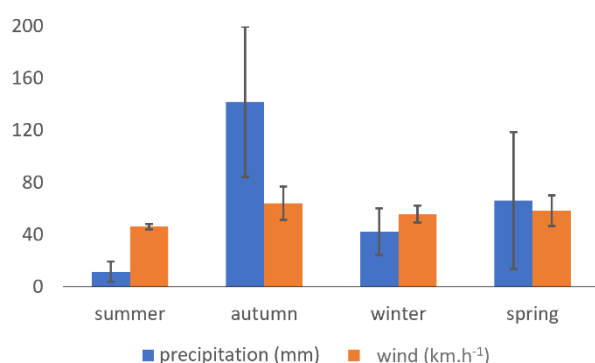

**Figure S2.** Seasonal precipitation level\* (mm) and wind velocity\* (km.h<sup>-1</sup>) averages regarding the Lis River basin; \* [49].

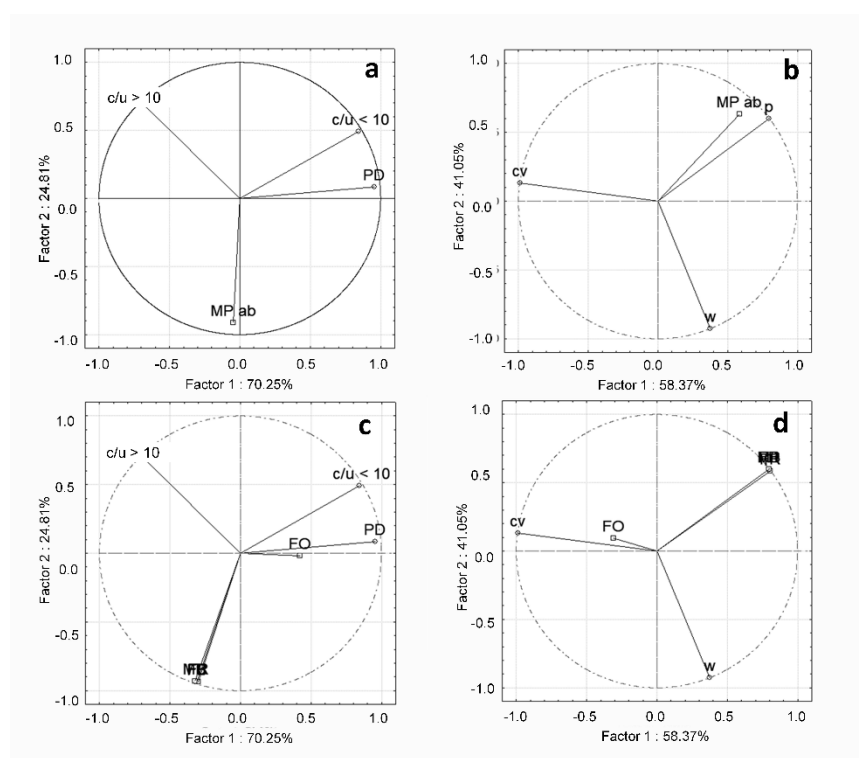

**Figure S3.** Principal components analysis

(PCAS), during summer between (a) MP abundance (MP ab, items.m<sup>-3</sup>) in water samples, population density\* (PD, hab.km<sup>-2</sup>) and proximity to companies/units < and > 10 km (c/u < 10 and c/u > 10), that include plastic products manufacturers and suppliers, recycling units, solid waste management units and WWTP; (b) MP abundance (MP ab, items.m<sup>-3</sup>), wind\*\* (w, km.h<sup>-1</sup>), precipitation\*\* (p, mm) and current velocity (cv, m.s<sup>-1</sup>); (c) abundances (items.m<sup>-3</sup>) of different MP typologies (fibres - FB, fragments - FR, foams - FO and microbeads - MB), population density\* (PD, hab.km<sup>-2</sup>) and proximity to companies/units < and > 10 km (c/u < 10 and c/u > 10) and (d) abundances (items.m<sup>-3</sup>) of different MP typologies (fibres - FB, fragments - FR, foams - FO and microbeads - MB), wind\*\* (w, km.h<sup>-1</sup>), precipitation\*\* (p, mm) and current velocity (cv, m.s<sup>-1</sup>); \*[41]; \*\*[49].

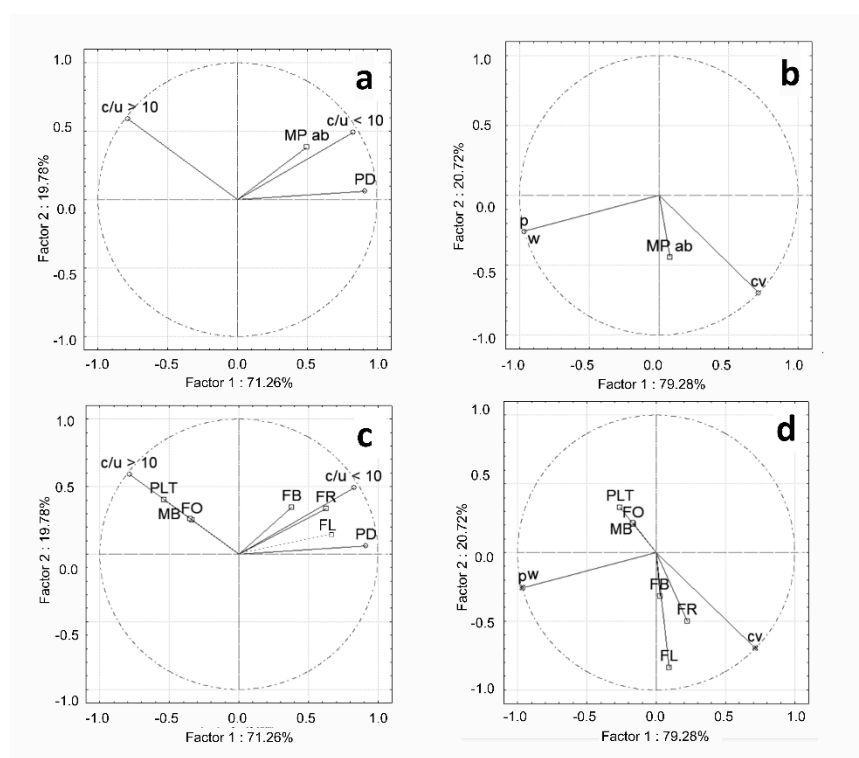

**Figure S4.** Principal components analysis (PCAS), during autumn between (a) MP abundance (MP ab, items.kg<sup>-1</sup>) in sediment samples, population density\* (PD, hab.km<sup>-2</sup>) and proximity to companies/units < and > 10 km (c/u < 10 and c/u > 10), that include plastic products manufacturers and suppliers, recycling units, solid waste management units and WWTP; (b) MP abundance (MP ab, items.kg<sup>-1</sup>), wind\*\* (w, km.h<sup>-1</sup>), precipitation\*\* (p, mm) and current velocity (cv, m.s<sup>-1</sup>); (c) abundances (items.kg<sup>-1</sup>) of different MP typologies (fibres – FB, fragments – FR, pellets – PLT, foams – FO, films – FL and microbeads – MB), population density\* (PD, hab.km<sup>-2</sup>) and proximity to companies/units < and > 10 km (c/u < 10 and c/u > 10) and (d) abundances (items.kg<sup>-1</sup>) of different MP typologies (fibres – FB, fragments – FR, pellets – PLT, foams – FO, films – FL and microbeads–MB), wind\*\* (w, km.h<sup>-1</sup>), precipitation\*\* (p, mm) and current velocity (cv, m.s<sup>-1</sup>); \*[41]; \*\*[49].

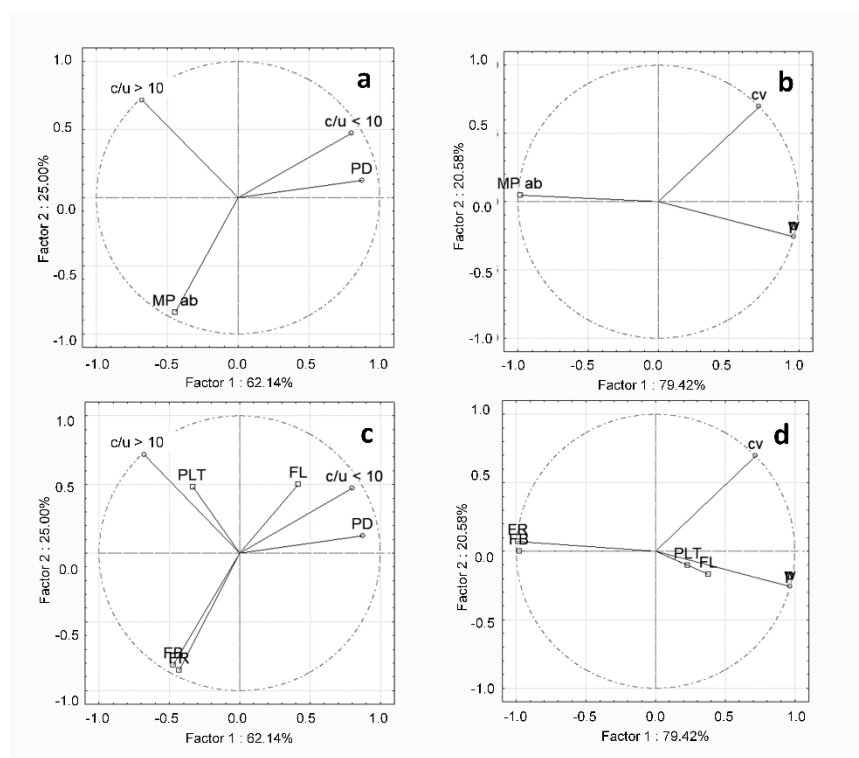

**Figure S5.** Principal components analysis (PCAS), during autumn between (a) MP abundance (MP ab, items.m<sup>-3</sup>) in water samples, population density\* (PD, hab.km<sup>-2</sup>) and proximity to companies/units < and > 10 km (c/u < 10 and c/u > 10), that include plastic products manufacturers and suppliers, recycling units, solid waste management units and WWTP; (b) MP abundance (MP ab, items.m<sup>-3</sup>), wind\*\* (w, km.h<sup>-1</sup>), precipitation\*\* (p, mm) and current velocity (cv, m.s<sup>-1</sup>); (c) abundances (items.m<sup>-3</sup>) of different MP typologies (fibres - FB, fragments - FR, pellets - PLT and films - FL), population density\* (PD, hab.km<sup>-2</sup>) and proximity to companies/units < and > 10 km (c/u < 10 and c/u > 10) and (d) abundances (items.m<sup>-3</sup>) of different MP typologies (fibres - FB, fragments - FR, pellets - PLT and films - FL), wind\*\* (w, km.h<sup>-1</sup>), precipitation\*\* (p, mm) and current velocity (cv, m.s<sup>-1</sup>); \*[41]; \*\*[49].
